# Supplementary material
Source: PubMed Central journal article supplement (PMC6276116)
Supplement: NIHMS996767-supplement-Supplement.pdf [file NIHMS996767-supplement-Supplement.pdf]

SUPPLEMENT:

**Supplemental Table1: Prevalence of Peripheral Artery Disease and Carotid Artery Disease in Men and Women by Risk Factors**

|            | Percent (95% CI)        |                              |                        |                            | Total               |
|------------|-------------------------|------------------------------|------------------------|----------------------------|---------------------|
|            | No Prior CHD            |                              | Prior CHD              |                            |                     |
|            | Diabetes<br>(n=324,680) | No diabetes<br>(n=2,950,224) | Diabetes<br>(n=51,848) | No diabetes<br>(n=191,052) |                     |
| <b>PAD</b> |                         |                              |                        |                            |                     |
| Men        | 5.84<br>(5.7, 5.98)     | 2.72<br>(2.69, 2.76)         | 13.43<br>(13.02,13.84) | 7.8<br>(7.63,7.97)         | 3.71<br>(3.68,3.75) |
| Women      | 8.49<br>(8.36,8.62)     | 4.29<br>(4.26,4.32)          | 18.17<br>(17.62,18.72) | 10.93<br>(10.71,11.16)     | 5.03<br>(5,5.06)    |
| <b>CAS</b> |                         |                              |                        |                            |                     |
| Men        | 6.21<br>(6.07,6.35)     | 3.27<br>(3.23,3.31)          | 13.23<br>(12.84,13.62) | 9.12<br>(8.94,9.29)        | 4.31<br>(4.27,4.35) |
| Women      | 5.71<br>(5.61,5.82)     | 2.88<br>(2.86,2.9)           | 14.01<br>(13.53,14.49) | 8.55<br>(8.36,8.75)        | 3.44<br>(3.42,3.46) |

**Supplemental Table2: Number of Participants with CAS in each Risk Factor Profile**

| <b>Risk Factors (RF)</b>     | <b>Number of Participants</b> |
|------------------------------|-------------------------------|
| <b>No diabetes No CHD</b>    | 2,950,224                     |
| <b>Diabetes 0 RF</b>         | 3,784                         |
| <b>Diabetes 1-2 RF</b>       | 71,182                        |
| <b>Diabetes 3-4 RF</b>       | 129,511                       |
| <b>Diabetes ≥5 RF</b>        | 48,178                        |
| <b>No diabetes Prior CHD</b> | 191,052                       |
| <b>Diabetes Prior CHD</b>    | 51,848                        |

**Supplemental Table3: Number of Participants with PAD in each Risk Factor Profile**

| <b>Risk Factors (RF)</b>     | <b>Number of Participants</b> |
|------------------------------|-------------------------------|
| <b>No diabetes No CHD</b>    | 2,950,224                     |
| <b>Diabetes 0 RF</b>         | 3,990                         |
| <b>Diabetes 1-2 RF</b>       | 76,415                        |
| <b>Diabetes 3-4 RF</b>       | 134,619                       |
| <b>Diabetes ≥5 RF</b>        | 42,707                        |
| <b>No diabetes Prior CHD</b> | 191,052                       |
| <b>Diabetes Prior CHD</b>    | 51,848                        |

**Supplemental Table4. Prevalence of Peripheral Arterial Disease or Carotid Artery Stenosis in Relation to Diabetes Mellitus, Risk Factors (RF) and Coronary Heart Disease (CHD)**

|            | <b>Percent 95% CI</b> |                        |                        |                       |                    |                    |
|------------|-----------------------|------------------------|------------------------|-----------------------|--------------------|--------------------|
|            | <b>No Prior CHD</b>   |                        |                        | <b>Prior CHD</b>      |                    |                    |
|            | <b>No Diabetes</b>    | <b>Diabetes 1-2 RF</b> | <b>Diabetes 3-4 RF</b> | <b>Diabetes ≥5 RF</b> | <b>No Diabetes</b> | <b>Diabetes</b>    |
| <b>PAD</b> | 3.78(3.76,3.81)       | 4.28(4.13,4.44)        | 7.29(7.14,7.44)        | 12(11.7,12.3))        | 9.21(9.07,9.34)    | 15.49(15.16,15.82) |
| <b>CAS</b> | 3.02(3,3.04)          | 3.7(3.57,3.84)         | 6.21(6.08,6.34)        | 8.75(8.48,9.02)       | 8.88(8.75,9.01)    | 13.57(13.27,13.88) |

|                                                                                                         | Peripheral arterial disease<br>Odds Ratio (95% CI) | Carotid artery stenosis<br>Odds Ratio (95% CI) |
|---------------------------------------------------------------------------------------------------------|----------------------------------------------------|------------------------------------------------|
| No DM <sup>a</sup> , No CHD <sup>b</sup>                                                                | Ref                                                | Ref                                            |
| DM and<br>HTN <sup>c</sup> + Severe Obesity <sup>d</sup> + HLD <sup>e</sup> +<br>Sedentary <sup>f</sup> | 2.56 (2.41-2.71)                                   | 1.03 (0.94-1.13)                               |
| No DM, No CHD                                                                                           | Ref                                                | Ref                                            |
| DM and<br>Current Smoking + FH <sup>g</sup>                                                             | 1.77 (1.68-1.86)                                   | 1.45 (1.37-1.54)                               |
| No DM, No CHD                                                                                           | Ref                                                | Ref                                            |
| DM and<br>Current Smoking + FH + HTN                                                                    | 1.90 (1.79-2.01)                                   | 1.59 (1.49-1.70)                               |
| No DM, No CHD                                                                                           | Ref                                                | Ref                                            |
| DM and<br>Current Smoking + FH + HLD                                                                    | 1.81 (1.71-1.91)                                   | 1.55 (1.45-1.66)                               |
| No DM, No CHD                                                                                           | Ref                                                | Ref                                            |
| DM and<br>Current Smoking + FH + HTD +<br>HLD                                                           | 1.94 (1.81-2.06)                                   | 1.67 (1.55-1.80)                               |
| No DM, No CHD                                                                                           | Ref                                                | Ref                                            |
| DM and<br>Former Smoking + FH                                                                           | 1.312 (1.24-1.39)                                  | 1.38 (1.30-1.47)                               |
| No DM, No CHD                                                                                           | Ref                                                | Ref                                            |
| DM and<br>Former Smoking + FH + HTN                                                                     | 1.42 (1.33-1.59)                                   | 1.54 (1.44-1.65)                               |
| No DM, No CHD                                                                                           | Ref                                                | Ref                                            |
| DM and<br>Former Smoking + FH + HLD                                                                     | 1.34 (1.26-1.43)                                   | 1.50 (1.41-1.61)                               |
| No DM, No CHD                                                                                           | Ref                                                | Ref                                            |
| DM and<br>Former Smoking + FH + HLD +<br>HTN                                                            | 1.45 (1.35-1.55)                                   | 1.65 (1.54-1.78)                               |

**Supplemental Table5.** Adjusted Odds of PAD/CAS in Diabetic Patients without CHD by Risk Factor Profile

<sup>a</sup>DM: Diabetes Mellitus defined as self-reported physician diagnosis or use of glucose lowering agents

<sup>b</sup>**CHD**: Coronary Heart Disease defined as prior myocardial infarction or prior coronary revascularization (coronary artery bypass, angioplasty, or percutaneous coronary intervention)

<sup>c</sup>**HTN**: Hypertension defined as self-reported physician diagnosis or medication use

<sup>d</sup>**Severe Obesity**: BMI > 40 kg/m<sup>2</sup>

<sup>e</sup>**HLD**: High cholesterol defined as self-reported physician diagnosis or medication use

<sup>f</sup>**Sedentary**: did not report vigorous exercise in their leisure time at least once per week

<sup>g</sup>**FH**: Family history of cardiovascular disease (CVD) defined as self-reported first-degree relative with history of heart attack, stroke or procedure or surgery to increased blood flow to the legs prior to the age .
